# Supplementary material
Source: Springer Nature journal article supplement (https://www.springermedizin.de/resource/supplementary/12885_2014_4652_MOESM4_ESM.pdf/9466956)

A.

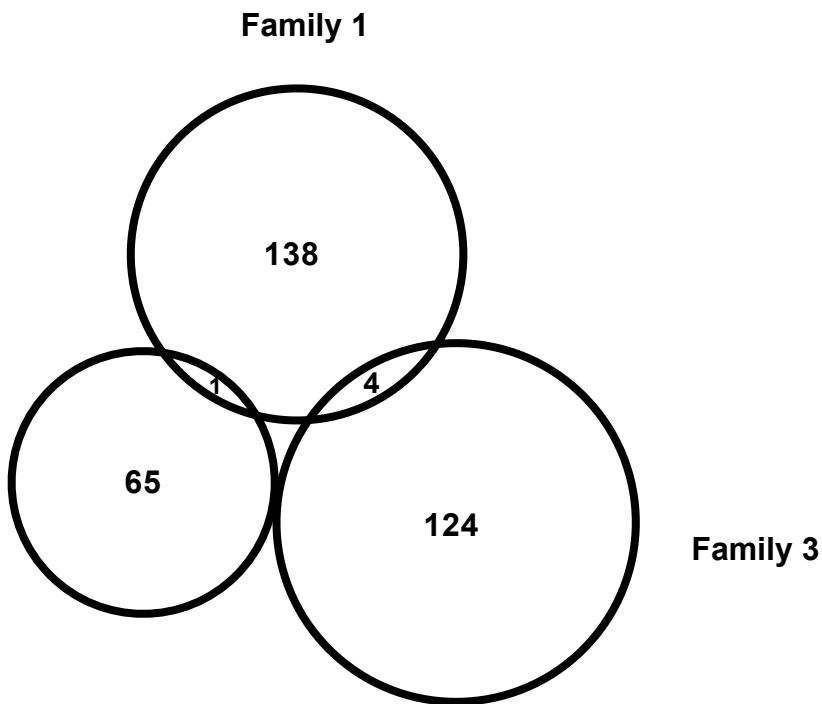

B.

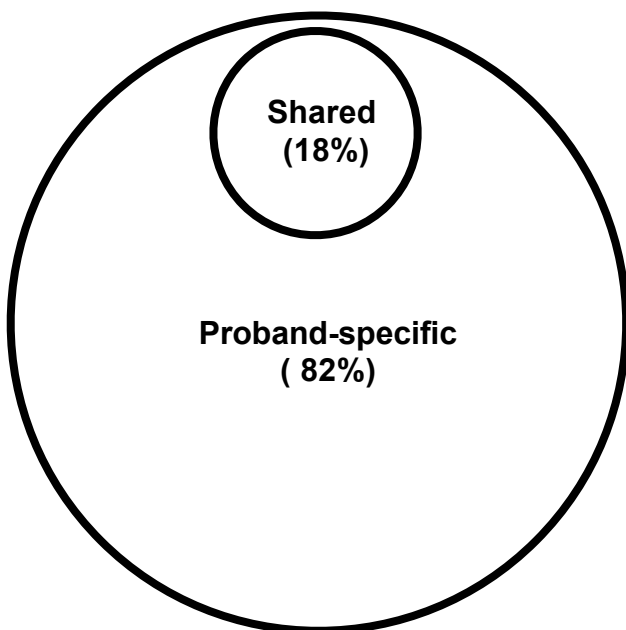

Supplement: MOESM4 [file 9466956]
